# Supplementary material for: The elusive dynamics of aqueous permanganate photochemistry
Source: Royal Society of Chemistry journal article supplement (doi:10.1039/c9cp07028a), 2020-01-01
Supplement: c9cp07028a1.pdf [file c9cp07028a1.pdf]

## Supplementary Information

### The elusive dynamics of aqueous permanganate photochemistry

Omer S. Haggag, Partha Malakar, Pavel Pokhilko (USC), John F. Stanton (University of Florida), Anna I. Krylov (USC), and Sanford Ruhman

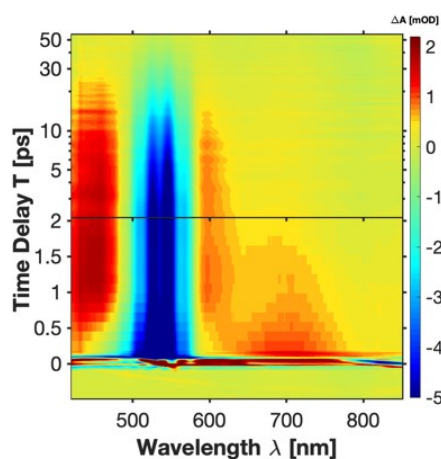

**S1.** Transient absorption data of aqueous permanganate pumped at 680 nm (pump 2). As seen, the obtained TA data is similar to the data obtained by pumping at 545 nm.

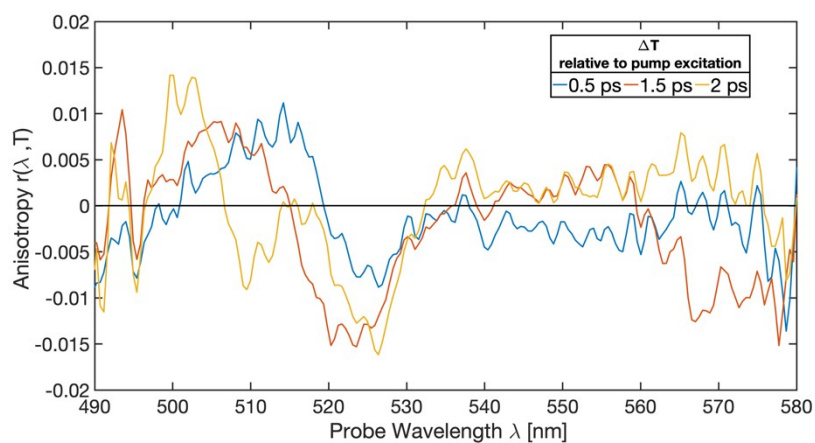

**S2.** Anisotropy spectrum at different delay times relative to pump excitation. No significant anisotropy is observed.

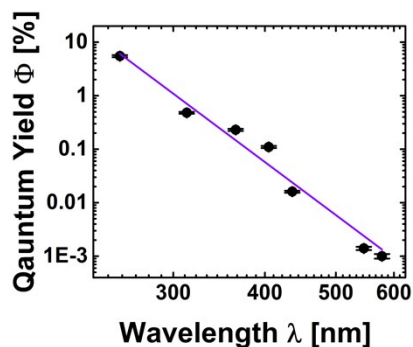

**S3.** The quantum yield of photoproduct formation ( ) as a function of CW excitation energy of aqueous permanganate. Based on data obtained from Zimmerman's work on the photochemistry of aqueous permanganate<sup>1</sup>

3.59 (3.56) eV <sup>1</sup>T<sub>2</sub> ——— ——— ———  
 3.52 (3.54) eV <sup>3</sup>E ——— ———  
 3.42 (3.40) eV <sup>3</sup>T<sub>2</sub> ——— ——— ———  
 3.24 (3.22) eV <sup>3</sup>T<sub>1</sub> ——— ——— ———  
 2.55 (2.51) eV <sup>1</sup>T<sub>2</sub> ——— ——— ———  
 2.02 (1.97) eV <sup>1</sup>T<sub>1</sub> ——— ——— ———  
 1.92 (1.87) eV <sup>3</sup>T<sub>2</sub> ——— ——— ———  
 1.68 (1.62) eV <sup>3</sup>T<sub>1</sub> ——— ——— ———  
 ——— GS

**S4.** Comparison of EOM-EE-CCSD excitation energies with aug-cc-pVTZ/cc-pV(T+d)Z and 6-31+G\* (in *parenthesis*) basis sets. wB97X-D/aug-cc-pVTZ/cc-pV(T+d)Z geometry was used in both cases.

Ground state, optimized with wB97X-D/aug-cc-pVTZ/cc-pV(T+d)Z.

Nuclear Repulsion Energy = 345.28139051 hartrees

\$molecule

-1 1

```
O 0.0000000000 -1.2950348696 0.9163894295
Mn 0.0000000000 0.0000000000 0.0000000000
O 0.0000000000 1.2950348696 0.9163894295
O 1.2950348696 0.0000000000 -0.9163894295
O -1.2950348696 0.0000000000 -0.9163894295
```

\$end

Lowest triplet state, optimized with EOM-EE-CCSD/aug-cc-pVTZ/cc-pV(T+d)Z

Nuclear Repulsion Energy = 336.01764397 hartrees

\$molecule

-1 1

|    |               |               |               |
|----|---------------|---------------|---------------|
| O  | -1.3647696715 | 0.0000000000  | -0.9489525273 |
| Mn | 0.0000000000  | 0.0000000000  | -0.1549118897 |
| O  | 1.3647696715  | 0.0000000000  | -0.9489525273 |
| O  | 0.0000000000  | 1.0524377450  | 1.1872245272  |
| O  | 0.0000000000  | -1.0524377450 | 1.1872245272  |

\$end

Lowest component of JT-distorted singlet state, optimized with EOM-EE-CCSD/aug-cc-pVTZ/cc-pV(T+d)Z

Nuclear Repulsion Energy = 336.21246872 hartrees

\$molecule

-1 1

|    |               |               |               |
|----|---------------|---------------|---------------|
| O  | -1.3529233114 | 0.0000000000  | -0.9668696001 |
| Mn | 0.0000000000  | 0.0000000000  | -0.1461383945 |
| O  | 1.3529233114  | 0.0000000000  | -0.9668696001 |
| O  | 0.0000000000  | 1.0476536534  | 1.1914485400  |
| O  | 0.0000000000  | -1.0476536534 | 1.1914485400  |

\$end

MECP between the ground state and the lowest triplet state, found with EOM-EE-CCSD/aug-cc-pVTZ/cc-pV(T+d)Z

Nuclear Repulsion Energy = 337.82991430 hartrees

\$molecule

-1 1

|    |               |               |               |
|----|---------------|---------------|---------------|
| O  | -1.3638720088 | 0.0000000000  | -0.9226054744 |
| Mn | 0.0000000000  | 0.0000000000  | -0.1241032705 |
| O  | 1.3638720088  | 0.0000000000  | -0.9226054744 |
| O  | 0.0000000000  | 1.1379559579  | 1.1053666016  |
| O  | 0.0000000000  | -1.1379559579 | 1.1053666016  |

\$end

- (1) Zimmerman, G. Photochemical Decomposition of Aqueous Permanganate Ion. *The Journal of Chemical Physics* **1955**, 23 (5), 825. <https://doi.org/10.1063/1.1742130>.
